# Supplementary material
Source: PubMed Central journal article supplement (PMC3144301)

Supplemental Figure 1. Box plot of predicted probabilities for having albuminuria based on the self-assessment tool among individuals without and with albuminuria in the external validation data set (NHANES 1999-2004).

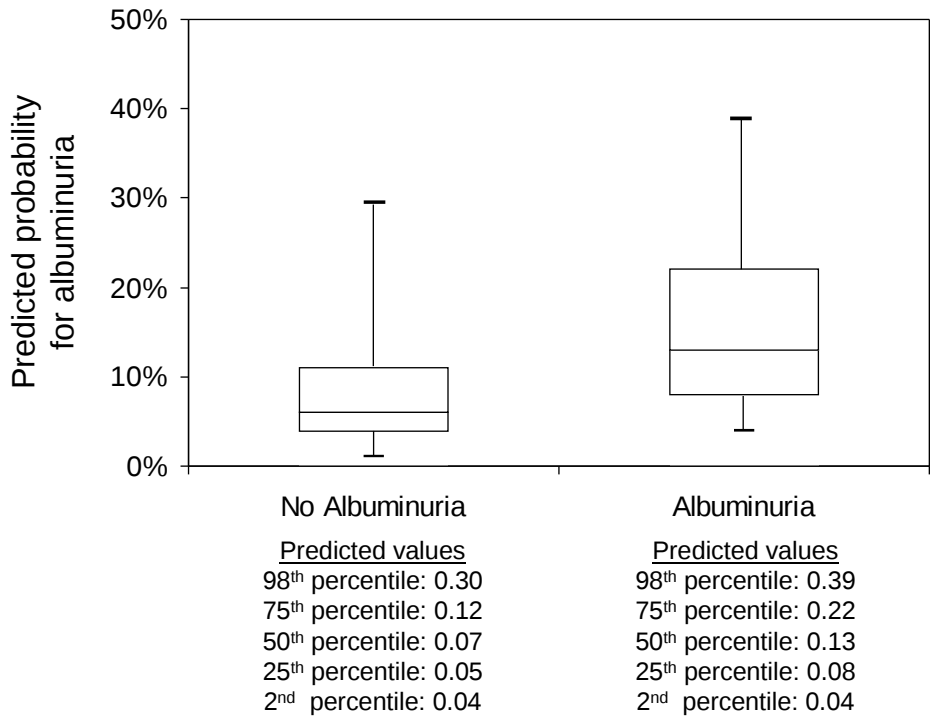

Supplement: NIHMS280671-supplement-01.pdf [file NIHMS280671-supplement-01.pdf]
