# Supplementary material
Source: PubMed Central journal article supplement (PMC3144301)
Supplement: NIHMS280671-supplement-02.pdf [file NIHMS280671-supplement-02.pdf]

Supplemental Figure 2. Calibration plot comparing observed and predicted probabilities for albuminuria in the external validation data set (NHANES 1999-2004).

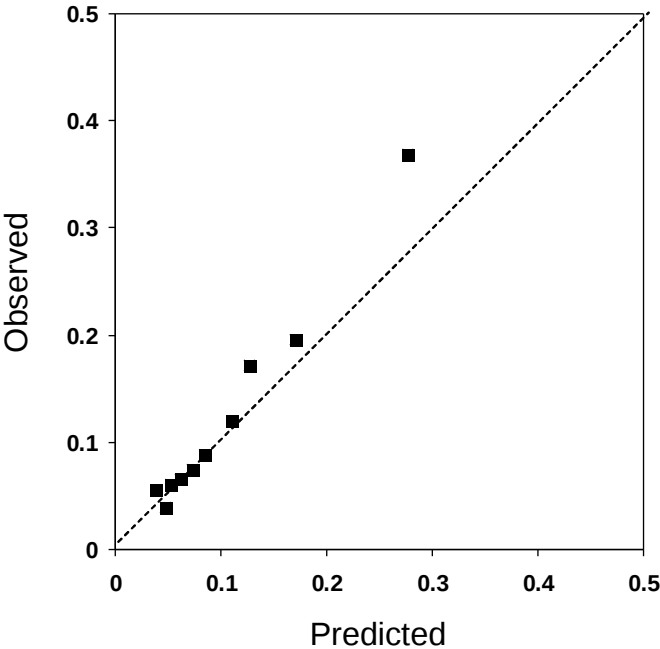

Each square represents a decile of predicted probability for having albuminuria via the self-assessment tool
