# Supplementary material
Source: PubMed Central journal article supplement (PMC3144301)
Supplement: NIHMS280671-supplement-03.pdf [file NIHMS280671-supplement-03.pdf]

Supplemental Figure 3. Decision curve for the self-assessment for screening for the presence of albuminuria in the validation data set (NHANES 1999-2004).

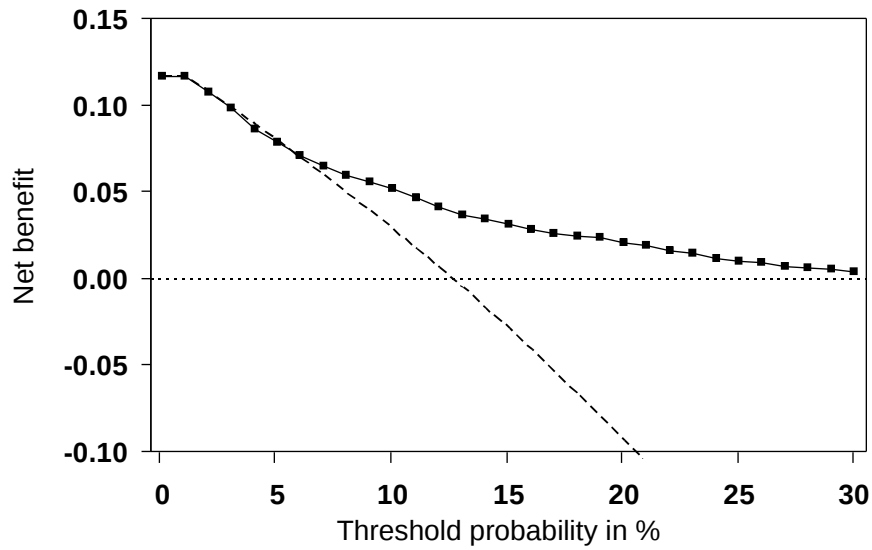

Solid line with squares: self-assessment tool  
Dashed line: Screen entire population  
Dotted line: Screen no one

Net benefit at  $p_t$  of 10% = 0.052 using the self-assessment tool and 0.028 for population-wide screening for albuminuria. If we screened for albuminuria based on the self-assessment tool, compared to screening no one in the population, we would detect 52 cases of albuminuria and screen no individuals without albuminuria. Additionally, using the self-assessment tool, at a pt of 10%, the net benefit of 215 fewer individuals without albuminuria being screened results per 1,000 population compared to screening everyone in the population with no increase in the number of individuals with albuminuria not being screened.
