# Supplementary material
Source: PubMed Central journal article supplement (PMC3144301)
Supplement: NIHMS280671-supplement-04.pdf [file NIHMS280671-supplement-04.pdf]

Supplementary Table S1; Muntner et al, *AJKD*, "Development and Validation of a Self-Assessment Tool for Albuminuria: Results From the Reasons for Geographic and Racial Differences in Stroke (REGARDS) Study"

**Table S1.** Characteristics of the National Health and Nutrition Examination Survey 1999-2004 study participants  $\geq 45$  years of age.

| Candidate item              | Overall    | Albuminuria     |                  | p-value |
|-----------------------------|------------|-----------------|------------------|---------|
|                             |            | No<br>(n=5,959) | Yes<br>(n=1,209) |         |
| Age, years                  | 59.6 (0.3) | 58.8 (0.3)      | 65.2 (0.5)       | <0.001  |
| African-American Race       |            |                 |                  |         |
| No, %                       | 91.0%      | 88.8%           | 11.2%            | <0.001  |
| Yes, %                      | 9.0%       | 81.6%           | 18.4%            |         |
| Gender                      |            |                 |                  |         |
| Women, %                    | 53.3%      | 87.9%           | 12.1%            | 0.338   |
| Men, %                      | 46.7%      | 87.1%           | 12.9%            |         |
| Smoking                     |            |                 |                  |         |
| Not current                 | 82.8%      | 88.0%           | 12.6%            | 0.600   |
| Current                     | 17.2%      | 87.4%           | 12.0%            |         |
| Self-rated health           |            |                 |                  |         |
| Excellent                   | 18.7%      | 91.5%           | 8.5%             | <0.001  |
| Very good                   | 29.2%      | 91.8%           | 8.2%             |         |
| Good                        | 30.8%      | 86.0%           | 14.0%            |         |
| Fair                        | 16.4%      | 81.0%           | 19.0%            |         |
| Poor                        | 4.9%       | 78.2%           | 21.8%            |         |
| Self-report of hypertension |            |                 |                  |         |
| No                          | 39.9%      | 90.4%           | 9.6%             | <0.001  |
| Yes                         | 60.1%      | 83.2%           | 16.8%            |         |
| Self-report of stroke       |            |                 |                  |         |
| No                          | 96.2%      | 88.1%           | 11.9%            | <0.001  |
| Yes                         | 3.8%       | 72.4%           | 27.6%            |         |
| Self-report of diabetes     |            |                 |                  |         |
| No                          | 88.7%      | 89.8%           | 10.2%            | <0.001  |
| Yes                         | 11.3%      | 69.4%           | 30.6%            |         |
