# Supplementary material
Source: PubMed Central journal article supplement (PMC3144301)
Supplement: NIHMS280671-supplement-05.pdf [file NIHMS280671-supplement-05.pdf]

Supplementary Table S2; Muntner et al, AJKD, "Development and Validation of a Self-Assessment Tool for Albuminuria: Results From the Reasons for Geographic and Racial Differences in Stroke (REGARDS) Study"

**Table S2.** Test characteristics of the self-assessment tool for albuminuria and self-report of diabetes and hypertension in the National Health and Nutrition Examination Survey 1999-2004 – external validation.

|                                           | C-statistic | Positive test result | Sensitivity | Specificity | Predictive value |          |
|-------------------------------------------|-------------|----------------------|-------------|-------------|------------------|----------|
|                                           |             |                      |             |             | Positive         | Negative |
| Self-assessment tool $\geq$ 10%           | 0.714       | 36%                  | 66%         | 68%         | 23%              | 93%      |
| Sub-groups                                |             |                      |             |             |                  |          |
| History of hypertension                   |             |                      |             |             |                  |          |
| No                                        | 0.714       | 17%                  | 45%         | 85%         | 25%              | 94%      |
| Yes                                       | 0.685       | 63%                  | 84%         | 41%         | 22%              | 93%      |
| History of diabetes mellitus              |             |                      |             |             |                  |          |
| No                                        | 0.683       | 28%                  | 53%         | 75%         | 19%              | 93%      |
| Yes                                       | 0.600       | 98%                  | 100%        | 2%          | 31%              | 100%     |
| Estimated GFR, ml/min/1.73 m <sup>2</sup> |             |                      |             |             |                  |          |
| $\geq$ 60                                 | 0.703       | 30%                  | 58%         | 73%         | 20%              | 94%      |
| < 60                                      | 0.651       | 76%                  | 91%         | 29%         | 30%              | 90%      |

Positive test result is defined as a probability of albuminuria  $\geq$  10% for the self-assessment tool.
